# Supplementary material for: Impact of Full-Field Digital Mammography Versus Film-Screen Mammography in Population Screening: A Meta-Analysis
Source: PubMed Central journal article supplement — J Natl Cancer Inst. 2020 Jun 23;113(1):16–26. doi: 10.1093/jnci/djaa080 (PMC7781455; doi:10.1093/jnci/djaa080), 2020-06-23

# Supplementary Material

Figure 1: Selection of Included Studies and search strategy

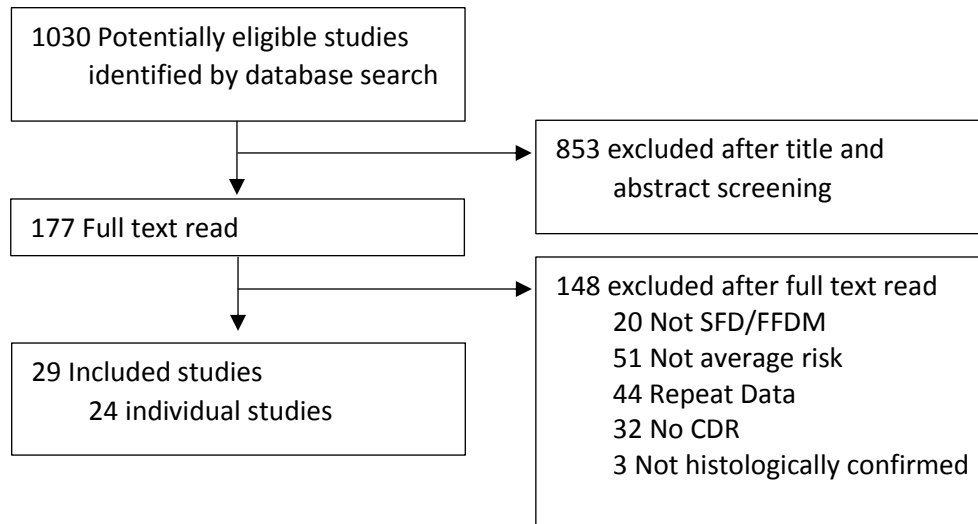

## Search strategy

1. digital\*.mp.
2. film\*.mp.
3. mammograph\*.mp.
4. Mammography/
5. 3 or 4
6. 1 and 2 and 5

Table 1: Characteristics of studies

| Author                                                         | Study type                  | Country       | Population              | Film      | Digital   | Screening interval | Screening age range |
|----------------------------------------------------------------|-----------------------------|---------------|-------------------------|-----------|-----------|--------------------|---------------------|
| Campari (2016) <sup>42</sup>                                   | Observational Retrospective | Italy         | Reggio Emilia           | 2011      | 2012      | 2 years            | 45-74               |
| Chiarelli (2013) <sup>41</sup><br>Prummel (2016) <sup>10</sup> | Observational Retrospective | Canada        | Ontario                 | 2008-2009 | 2008-2009 | 2 years            | 50-74               |
| Dabbous (2017) <sup>40</sup>                                   | Observational Retrospective | United States | Chicago                 | NI        | NI        | 1 year             | 40-79               |
| Del Turco (2007) <sup>13</sup>                                 | Observational Retrospective | Italy         | Florence                | 2004-2005 | 2004-2005 | 2 years            | 50-69               |
| Glynn (2011) <sup>39</sup>                                     | Observational Retrospective | United States | St Louis Institution    | 2004-2005 | 2006-2009 | 1 year             | 27-92               |
| Hambly (2009) <sup>38</sup>                                    | Observational Retrospective | Ireland       | All                     | 2005-2007 | 2005-2007 | 2 years            | 50-64               |
| Heddson (2007) <sup>37</sup>                                   | Observational Retrospective | Sweden        | Helsingborg Hospital    | 2000-2002 | 2002-2005 | 2 years            | 46-74               |
| Henderson (2015) <sup>35,36</sup>                              | Observational Retrospective | United States | 6 US Programs           | 2003-2011 | 2003-2011 | 1 year             | 40-89               |
| Hofvind (2014) <sup>14</sup>                                   | Observational Retrospective | Norway        | All (except Oslo study) | 1996-2010 | 2000-2010 | 2 years            | 50-69               |
| Kerlikoske (2011) <sup>34</sup>                                | Observational Retrospective | United States | 4 US Programs           | 2000-2006 | 2000-2006 | 1 year             | 40-79               |
| Lewin (2006) <sup>32,33</sup>                                  | Paired Prospective          | United States | CO, MA                  | 1999      | 1999      | 1 year             | 40+                 |
| Lipasti (2010) <sup>31</sup>                                   | Observational Retrospective | Finland       | Southern Finland        | 1999-2000 | 2007-2008 | 2 years            | 50-59               |
| Perry (2011) <sup>30</sup>                                     | Observational Retrospective | UK            | London company          | 2000-2006 | 2000-2007 | 2 years            | 40-70               |
| Pisano (2005) <sup>7,29</sup>                                  | Paired Prospective          | United States | 33 sites US and Canada  | 2001-2003 | 2001-2003 | 455 days           | 47-62               |
| Sala (2015) <sup>11</sup>                                      | Observational Retrospective | Spain         | Barcelona               | 1995-2007 | 2004-2010 | 2 years            | 50-69               |
| Sankatsing (2018) <sup>28</sup>                                | Observational Retrospective | Netherlands   | All                     | 2004-2010 | 2007-2011 | 2 years            | 50-74               |
| Seradour (2014) <sup>27</sup>                                  | Observational Retrospective | France        | Bouches du Rhône        | 2008-2010 | 2008-2010 | 2 years            | 50-74               |
| Skaane (2005) <sup>26</sup><br>(Oslo I)                        | Paired Prospective          | Norway        | Oslo                    | 2000      | 2000      | 2 years            | 50-69               |
| Skaane (2007) <sup>9</sup><br>(Oslo II)                        | Randomized Trial            | Norway        | Oslo                    | 2000-2001 | 2000-2001 | 1 year             | 45-69               |
| Theberge (2016) <sup>25</sup>                                  | Observational Retrospective | Canada        | Quebec                  | 2007-2012 | 2010-2012 | 2 years            | 50-69               |
| Timmermans (2017) <sup>24</sup>                                | Observational Retrospective | Belgium       | Flanders                | 2009-2010 | 2009-2010 | 2 years            | 50-69               |
| Van Luit (2013) <sup>23</sup>                                  | Observational Retrospective | Netherlands   | All                     | 2004-2010 | 2007-2010 | 2 years            | 50-74               |
| Van Ongeval (2010) <sup>22</sup>                               | Observational Retrospective | Belgium       | 3 regional units        | 2001-2007 | 2005-2008 | 2 years            | 50-69               |
| Vernacchia (2009) <sup>21</sup>                                | Observational Retrospective | United States | California Clinic       | 2004-2005 | 2005-2008 | 1 year             | NI                  |
| Vinnicombe (2009) <sup>20</sup>                                | Observational Retrospective | UK            | East/Central London     | 2001-2007 | 2005-2007 | 3 years            | 50-70               |

\*NI no information

| Author                                                         | Confounding | Selection | Intervention Classification | Deviations Intervention | Missing Data | Measurement Outcome | Reported Results | Overall  |
|----------------------------------------------------------------|-------------|-----------|-----------------------------|-------------------------|--------------|---------------------|------------------|----------|
| Campari (2016) <sup>42</sup>                                   | Serious     | Low       | Low                         | Low                     | Low          | Low                 | Low              | Serious  |
| Chiarelli (2013) <sup>41</sup><br>Prummel (2016) <sup>10</sup> | Moderate    | Low       | Low                         | Low                     | Low          | Low                 | Low              | Moderate |
| Dabbous (2017) <sup>40</sup>                                   | Critical    | Low       | Low                         | Low                     | Moderate     | Low                 | Low              | Critical |
| Del Turco (2007) <sup>13</sup>                                 | Serious     | Low       | Low                         | Low                     | Low          | Low                 | Low              | Serious  |
| Glynn (2011) <sup>39</sup>                                     | Critical    | Low       | Low                         | Low                     | Low          | Low                 | Low              | Critical |
| Hambly (2009) <sup>38</sup>                                    | Moderate    | Low       | Low                         | Low                     | Low          | Low                 | Low              | Moderate |
| Heddson (2007) <sup>37</sup>                                   | Critical    | Low       | Low                         | Moderate                | Low          | Low                 | Low              | Critical |
| Henderson (2015) <sup>35,36</sup>                              | Moderate    | Low       | Low                         | Low                     | Low          | Low                 | Low              | Moderate |
| Hofvind (2014) <sup>14</sup>                                   | Serious     | Low       | Low                         | Low                     | Low          | Low                 | Low              | Serious  |
| Kerlikoske (2011) <sup>34</sup>                                | Moderate    | Low       | Low                         | Low                     | Low          | Low                 | Low              | Moderate |
| Lewin (2006) <sup>32,33</sup>                                  | Low         | Low       | Low                         | Low                     | Low          | Low                 | Low              | Low      |
| Lipasti (2010) <sup>31</sup>                                   | Critical    | Low       | Low                         | Low                     | Low          | Low                 | Low              | Critical |
| Perry (2011) <sup>30</sup>                                     | Moderate    | Low       | Low                         | Low                     | Low          | Low                 | Low              | Moderate |
| Pisano (2005) <sup>7,29</sup>                                  | Low         | Low       | Low                         | Low                     | Low          | Low                 | Low              | Low      |
| Sala (2015) <sup>11</sup>                                      | Serious     | Low       | Low                         | Low                     | Low          | Low                 | Low              | Serious  |
| Sankatsing (2018) <sup>28</sup>                                | Serious     | Low       | Low                         | Moderate                | Low          | Low                 | Low              | Serious  |
| Seradour (2014) <sup>27</sup>                                  | Moderate    | Low       | Low                         | Low                     | Low          | Low                 | Low              | Moderate |
| Skaane (2005) <sup>26</sup><br>(Oslo I)                        | Low         | Low       | Low                         | Low                     | Low          | Low                 | Low              | Low      |
| Skaane (2007) <sup>9</sup><br>(Oslo II)                        | Moderate    | Low       | Low                         | Low                     | Low          | Low                 | Low              | Moderate |
| Theberge (2016) <sup>25</sup>                                  | Moderate    | Low       | Moderate                    | Low                     | Low          | Low                 | Low              | Moderate |
| Timmermans (2017) <sup>24</sup>                                | Serious     | Low       | Low                         | Low                     | Low          | Low                 | Low              | Serious  |
| Van Luit (2013) <sup>23</sup>                                  | Serious     | Low       | Low                         | Low                     | Low          | Low                 | Low              | Serious  |
| Van Ongeval (2010) <sup>22</sup>                               | Serious     | Low       | Low                         | Low                     | Low          | Low                 | Low              | Serious  |
| Vernacchia (2009) <sup>21</sup>                                | Serious     | Low       | Low                         | Low                     | Low          | Low                 | Low              | Serious  |
| Vinnicombe (2009) <sup>20</sup>                                | Moderate    | Low       | Low                         | Low                     | Low          | Low                 | Low              | Moderate |

Table 2: Risk of Bias Assessment

**Table 2.1: Risk of bias for confounding assessment**

| 1 Is there potential for confounding of the effect of intervention in this study?                                                                           |   |   |    |    |    |   |    |    |             |                                                      |                                                                                                  |                                                                                                                                                                      |  |
|-------------------------------------------------------------------------------------------------------------------------------------------------------------|---|---|----|----|----|---|----|----|-------------|------------------------------------------------------|--------------------------------------------------------------------------------------------------|----------------------------------------------------------------------------------------------------------------------------------------------------------------------|--|
| 2 Was there a different timeframe for when the participants' received the intervention?                                                                     |   |   |    |    |    |   |    |    |             |                                                      |                                                                                                  |                                                                                                                                                                      |  |
| 3 Was the difference in timeframe for when the participants' received the intervention likely to be related to factors that are prognostic for the outcome? |   |   |    |    |    |   |    |    |             |                                                      |                                                                                                  |                                                                                                                                                                      |  |
| 4 Did the authors provide information to control for all the important confounding domains?                                                                 |   |   |    |    |    |   |    |    |             |                                                      |                                                                                                  |                                                                                                                                                                      |  |
| 5 Were confounding domains that were controlled for measured validly and reliably by the variables available in this study?                                 |   |   |    |    |    |   |    |    |             |                                                      |                                                                                                  |                                                                                                                                                                      |  |
| 6 Did the authors control for any post-intervention variables that could have been affected by the intervention?                                            |   |   |    |    |    |   |    |    |             |                                                      |                                                                                                  |                                                                                                                                                                      |  |
| 7 Did the authors provide information to control for all the important confounding domains and timeframe confounding?                                       |   |   |    |    |    |   |    |    |             |                                                      |                                                                                                  |                                                                                                                                                                      |  |
| 8 Were confounding domains that were controlled for measured validly and reliably by the variables available in this study?                                 |   |   |    |    |    |   |    |    |             |                                                      |                                                                                                  |                                                                                                                                                                      |  |
| Author                                                                                                                                                      | 1 | 2 | 3  | 4  | 5  | 6 | 7  | 8  | Confounding | Concurrence                                          | Confounders Measured                                                                             | Unadjusted vs Adjusted (95 % CI)                                                                                                                                     |  |
| Campari                                                                                                                                                     | Y | Y | PN | N  | PY | N | PN | PY | Serious     | 0%                                                   | age, round                                                                                       | CD RR= 0.88 vs. 0.95 (0.79-1.13)<br>Recall RR= 1.34 vs. 1.46 (1.37-1.56)                                                                                             |  |
| Chiarelli/ Prummel                                                                                                                                          | Y | N | NA | PY | PY | N | PY | NA | Moderate    | 100%                                                 | age, round, HRT, density, family history, menarche, reproductive status, menopausal status, unit | CD RR= 1.02 vs. 0.97 (0.88-1.06)<br>Recall RR= 1.04 vs. 1.06 (1.00-1.13)<br>IC RR= 1.05 vs. 1.05 (0.90-1.12)                                                         |  |
| Dabbous                                                                                                                                                     | Y | Y | Y  | N  | PY | N | N  | NA | Critical    | NI                                                   | age, menopause status, density, ethnicity                                                        | CD RD= -0.31 vs. -0.5<br>Digital: more white women than black women                                                                                                  |  |
| Del Turco                                                                                                                                                   | Y | N | NA | N  | PY | N | PN | NA | Serious     | 100%                                                 | age, round, density                                                                              | NI                                                                                                                                                                   |  |
| Glynn                                                                                                                                                       | Y | Y | PY | N  | NA | N | N  | NI | Critical    | 0%                                                   | NI                                                                                               | NA                                                                                                                                                                   |  |
| Hambly                                                                                                                                                      | Y | N | NA | N  | PY | N | PY | NA | Moderate    | 100% Quasi-random                                    | age, round                                                                                       | NI                                                                                                                                                                   |  |
| Heddson                                                                                                                                                     | Y | Y | PY | N  | NA | N | N  | NI | Critical    | 0%                                                   | age                                                                                              | NI                                                                                                                                                                   |  |
| Henderson                                                                                                                                                   | Y | Y | PN | PY | PY | N | PY | NA | Moderate    | 22% Film decreasing and digital increasing over time | age, ethnicity, HRT, screening interval, year, unit                                              | CD RR= 1.01 vs. 1.06 (0.97-1.16)<br>IC RR= 0.94 vs. 0.93 (0.78-1.10)<br>Digital: more Asian women, shorter screening interval<br>Film: more Hispanic women, more HRT |  |

|                  |    |    |    |    |    |   |    |    |          |                               |                                                                         |                                                                                                  |
|------------------|----|----|----|----|----|---|----|----|----------|-------------------------------|-------------------------------------------------------------------------|--------------------------------------------------------------------------------------------------|
| Hofvind          | Y  | Y  | PY | N  | PY | N | N  | PY | Serious  | 66%                           | age, round, year                                                        | CD RR= 0.94 vs. 1.05 (0.98-1.14)<br>IC RR= 1.10 vs. 1.27 (1.07-1.50)                             |
| Kerlikoske       | Y  | Y  | PY | PY | PY | N | PY | NA | Moderate | 100%                          | age, density, menopause status, family history, ethnicity, round        | CD RR= 0.97 vs. 1.0 (0.9-1.1)                                                                    |
| Lewin            | N  |    |    |    |    |   |    |    | Low      | 100%                          | Age, Density, Round, family history, HRT, nulliparous, childbearing age | NI                                                                                               |
| Lipasti          | Y  | Y  | Y  | N  | NA | N | N  | NI | Critical | 0%<br>7 years between cohorts | NI                                                                      | NA                                                                                               |
| Perry            | Y  | PN | PN | PN | PY | N | PN | PY | Moderate | 87.50%<br>Quasi random        | age                                                                     | NI                                                                                               |
| Pisano           | N  |    |    |    |    |   |    |    | Low      | 100%<br>Paired                | NI                                                                      | NA                                                                                               |
| Sala             | Y  | Y  | PY | N  | PY | N | N  | PY | Serious  | 25%                           | age, round                                                              | NI                                                                                               |
| Sankatsing       | Y  | Y  | PN | N  | PY | N | PN | PY | Serious  | 50%                           | age, round                                                              | CD RD= 0.9 vs. 0.8 (0.7-1.0)<br>Recall RD= 5.0 vs 5.0 (4.7-5.3)<br>IC RD= 0.0 vs. 0.0 (-0.2-0.1) |
| Seradour         | Y  | N  | NA | PY | PY | N | PY | NA | Moderate | 100%                          | age, density, screening round, HRT                                      | NI                                                                                               |
| Skaane (Oslo I)  | N  |    |    |    |    |   |    |    | Low      | 100%<br>Paired                | NI                                                                      | NA                                                                                               |
| Skaane (Oslo II) | PY | N  | NA | PN | PY | N | NI | NA | Moderate | 100%<br>Randomised            | NI                                                                      | NA                                                                                               |
| Theberge         | Y  | Y  | PN | PY | PY | N | Y  | PY | Moderate | 50%                           | age, density, BMI, family history, menopause status, parity, HRT,       | CD RR= 1.16 vs. 1.06 (0.89-1.25)                                                                 |
| Timmermans       | Y  | N  | NA | N  | PY | N | PN | NA | Serious  | 100%                          | age, density                                                            | NI                                                                                               |
| van Luijt        | Y  | Y  | PY | N  |    |   | N  | NA | Serious  | 14%                           |                                                                         |                                                                                                  |
| Van Ongeval      | Y  | Y  | PY | N  | PY | N | N  | PY | Serious  | 33%                           | NI                                                                      | NA                                                                                               |
| Vernacchia       | Y  | Y  | PY | N  | NA | N | PN | NI | Serious  | 0%                            | NI                                                                      | NA                                                                                               |

|            |   |   |    |    |    |   |    |    |          |      |                                                                  |                                                                                      |
|------------|---|---|----|----|----|---|----|----|----------|------|------------------------------------------------------------------|--------------------------------------------------------------------------------------|
| Vinnicombe | Y | N | NA | PY | PY | N | PY | NA | Moderate | 100% | age, round, ethnicity, area of residence, referral type, density | CD RR= 1.06 vs. 0.95 (0.65-1.25)<br>Digital: more young, Caucasian and self-referral |
|------------|---|---|----|----|----|---|----|----|----------|------|------------------------------------------------------------------|--------------------------------------------------------------------------------------|

Abbreviations: confidence interval (CI), no information (NI), not applicable (NA), yes (Y), no (N), probably yes (PY), probably no (PN), Hormone replacement therapy (HRT), Cancer Detection (CD), Interval Cancer (IC), Relative Risk (RR), Risk Difference (RD)

Table 3: Inclusion and Exclusion Criteria

| STEP                                | INCLUSIONS                                                                                                                                                                                                                                                                                                                                                                                                                                             | EXCLUSIONS                                                                                                                                                                                                                                                                                                               |
|-------------------------------------|--------------------------------------------------------------------------------------------------------------------------------------------------------------------------------------------------------------------------------------------------------------------------------------------------------------------------------------------------------------------------------------------------------------------------------------------------------|--------------------------------------------------------------------------------------------------------------------------------------------------------------------------------------------------------------------------------------------------------------------------------------------------------------------------|
| Screening titles and abstracts      | <ul style="list-style-type: none"> <li>• Studies that look at both film and digital mammography</li> <li>• Asymptomatic adult (18+) women</li> <li>• Studies in any setting</li> </ul>                                                                                                                                                                                                                                                                 | <ul style="list-style-type: none"> <li>• Studies that do not look at both film and digital mammography</li> <li>• Studies on women at high risk of breast cancer</li> <li>• Review papers, editorials, commentary/discussion papers.</li> </ul>                                                                          |
| Full Text Read/Data Extraction      | <ul style="list-style-type: none"> <li>• Compares Screen Film Mammography to Full Field Digital Mammography</li> <li>• Conducted on women who are of 'normal' risk of breast cancer</li> <li>• Breast Cancer diagnosis histologically confirmed (or reasonable to assume so)</li> <li>• Is original study/not reporting on same data that is already included</li> <li>• Measure either screen-detection rates and/or interval cancer rates</li> </ul> | <ul style="list-style-type: none"> <li>• Not Screen Film Mammography to Full Field Digital Mammography</li> <li>• Not average risk women</li> <li>• Repeat Data</li> <li>• Does not provide detection rate or numbers to calculate</li> <li>• Can't assume cancer diagnoses were histopathologically verified</li> </ul> |
| Overlapping cohorts and repeat data | <ul style="list-style-type: none"> <li>• Chose best study for each outcome from study population</li> <li>• Most screenings</li> <li>• Longest time period</li> <li>• Most recent</li> </ul>                                                                                                                                                                                                                                                           | <ul style="list-style-type: none"> <li>• Threshold of 20% overlap</li> </ul>                                                                                                                                                                                                                                             |

Figure 2: Forest Plot of screen-detection rates by round

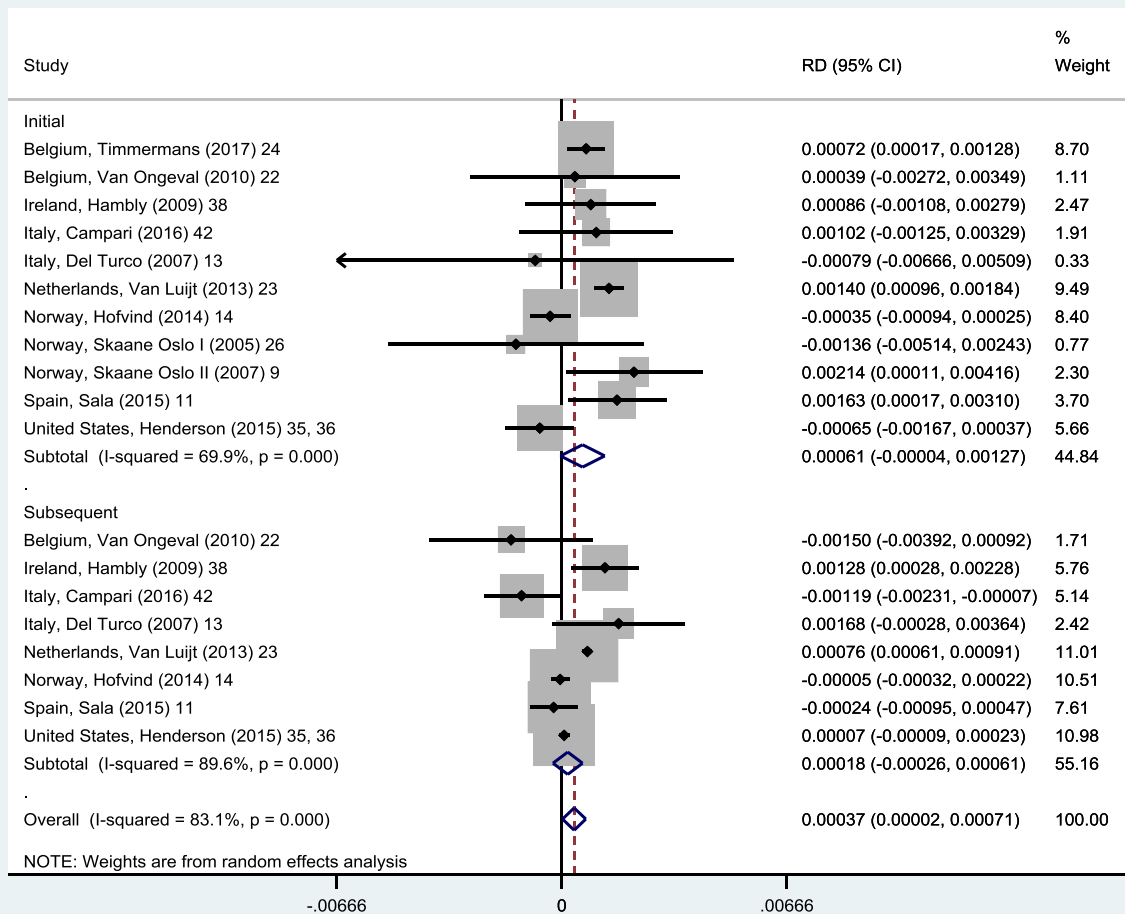



Figure 3: Forest Plot of screen-detection rates by age

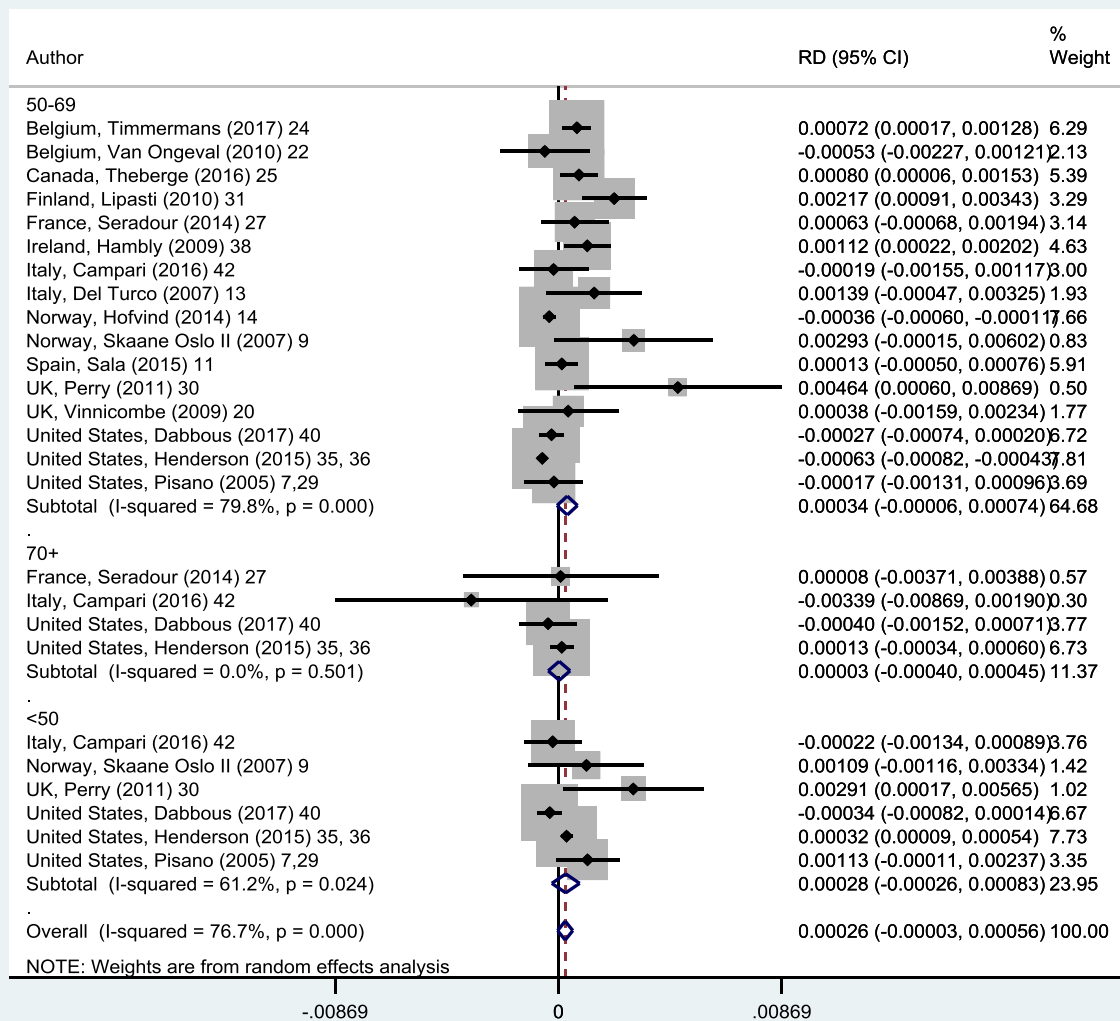

Figure 4: Forest Plot of screen-detection rates by density

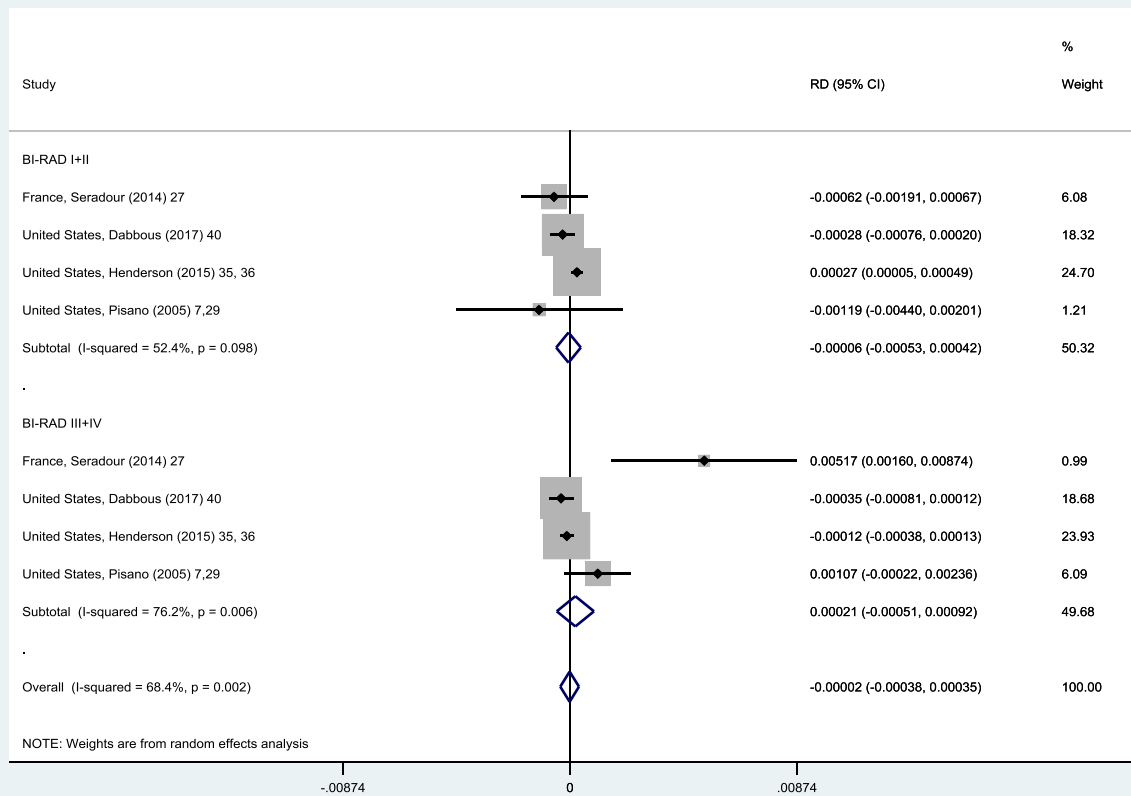

Supplement: djaa080_supplementary_data.pdf [file djaa080_supplementary_data.pdf]
